# Supplementary material
Source: Springer Nature journal article supplement (https://www.springermedizin.de/resource/supplementary/12943_2012_1032_MOESM5_ESM.pdf/9552124)

Kelly

NB69

SK-N-SH

SH-SY-5Y

SK-N-AS

SK-N-BE(2)

A B C

A B C

A B C

A B C

A B C

A B C

SK-N-DZ

SK-N-FI

IMR-32

Pos. ctrl

NTC

A B C

A B C

A B C

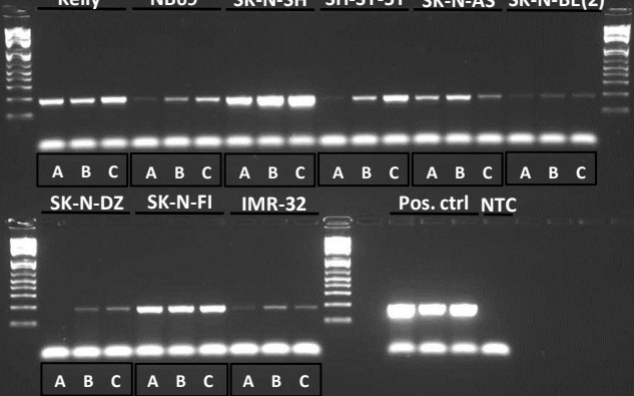

Supplement: MOESM5 [file 9552124]
